# Supplementary material for: The ArcA regulon and oxidative stress resistance in Haemophilus influenzae
Source: PubMed Central journal article supplement (PMC1974803; doi:10.1111/j.1365-2958.2007.05747.x), 2007-06-01
Supplement: mmi0064-1375-ts3.pdf [file mmi0064-1375-ts3.pdf]

**Table 3S.** Comparison of *arcA* microarray expression data between *H. influenzae* and *E. coli*

| <i>H. influenzae</i> |                                                                    | RAA6V/ RdV  |          | <i>E. coli</i> homolog      | Salmon <i>et al.</i><br><i>arcA</i> -/ <i>arcA</i> + |                 | Liu and De Wulf<br><i>arcA</i> -/ <i>arcA</i> + |                |
|----------------------|--------------------------------------------------------------------|-------------|----------|-----------------------------|------------------------------------------------------|-----------------|-------------------------------------------------|----------------|
| Gene ID              | Function                                                           | Fold change | P value  |                             | Fold change                                          | P value         | Fold change                                     | P value        |
| HI0007               | Formate dehydrogenase, beta subunit ( <i>fdxH</i> )                | 7.8         | 1.12E-09 | <i>fdnH</i>                 | -1.62                                                | 3.26E-02        |                                                 |                |
|                      |                                                                    |             |          | <b><i>fdoH</i></b>          | <b>2.32</b>                                          | <b>5.08E-02</b> |                                                 |                |
| HI0008               | Formate dehydrogenase, gamma subunit ( <i>fdxI</i> )               | 9.7         | 5.42E-09 | <i>fdnI</i>                 | -2.18                                                | 5.89E-03        |                                                 |                |
| HI0009               | FdhE protein ( <i>fdhE</i> )                                       | 9.7         | 8.39E-10 | <b><i>fdhE</i></b>          | <b>1.92</b>                                          | <b>1.65E-02</b> |                                                 |                |
| HI0018               | Uracil DNA glycosylase ( <i>ung</i> )                              | 2.5         | 1.01E-05 | <i>ung</i>                  |                                                      |                 |                                                 |                |
| HI0026               | Lipoate biosynthesis protein A ( <i>lipA</i> )                     | 2.6         | 4.08E-07 | <b><i>lipA</i></b>          | <b>1.82</b>                                          | <b>1.47E-01</b> |                                                 |                |
| HI0174               | Conserved hypothetical protein                                     | 2.3         | 1.75E-05 | <i>ycfB</i>                 | -1.36                                                | 9.44E-02        |                                                 |                |
| HI0608               | Conserved hypothetical protein                                     | 5.5         | 3.65E-10 | <i>yfbS</i>                 | -1.91                                                | 4.08E-03        |                                                 |                |
| HI0747               | NADH dehydrogenase ( <i>ndh</i> )                                  | 10.7        | 4.06E-11 | <b><i>ndh</i></b>           | <b>3.93</b>                                          | <b>6.47E-03</b> | -3.5                                            | 2.64E-02       |
| HI0889               | Serine hydroxymethyltransferase (serine methylase) ( <i>glyA</i> ) | 2.4         | 4.11E-06 | <i>glyA</i>                 | 1.04                                                 | 8.47E-01        |                                                 |                |
| HI0890               | Dephospho-CoA kinase                                               | 2.5         | 4.83E-05 | <i>coaE</i> ( <i>yacE</i> ) |                                                      |                 |                                                 |                |
| HI1218               | L-lactate permease ( <i>lldP</i> )                                 | 44.0        | 1.20E-08 | <i>lctP</i> ( <i>lldP</i> ) |                                                      |                 | <b>11.4</b>                                     | <b>2.0E-04</b> |
| HI1444               | 5,10 methylenetetrahydrofolate reductase ( <i>metF</i> )           | 5.6         | 4.91E-06 | <i>metF</i>                 |                                                      |                 |                                                 |                |
| HI1661               | 2-oxoglutarate dehydrogenase E2 component ( <i>sucB</i> )          | 2.8         | 5.33E-07 | <b><i>sucB</i></b>          | <b>15.50</b>                                         | <b>1.14E-03</b> |                                                 |                |
| HI1662               | 2-oxoglutarate dehydrogenase E1 component ( <i>sucA</i> )          | 2.6         | 6.71E-07 | <b><i>sucA</i></b>          | <b>11.14</b>                                         | <b>1.85E-03</b> |                                                 |                |
| HI1727               | Argininosuccinate synthetase ( <i>argG</i> )                       | 4.8         | 5.02E-07 | <i>argG</i>                 | -1.82                                                | 5.94E-03        |                                                 |                |
| HI1728               | Conserved hypothetical protein                                     | 3.5         | 1.54E-06 | <i>yfeP</i>                 | -1.78                                                | 4.54E-03        |                                                 |                |
| HI1730               | Conserved hypothetical protein                                     | 3.0         | 1.48E-06 | <i>ybgK</i>                 |                                                      |                 |                                                 |                |
| HI1731               | Conserved hypothetical protein                                     | 5.9         | 2.52E-09 | <i>ybgJ</i>                 |                                                      |                 |                                                 |                |
| HI1739.1             | L-lactate dehydrogenase ( <i>lldD</i> )                            | 3.2         | 1.79E-10 | <i>lctD</i> ( <i>lldD</i> ) |                                                      |                 | <b>11.4</b>                                     | <b>2.0E-04</b> |
| HI0590               | Putrescine-ornithine antiporter ( <i>potE</i> )                    | -2.5        | 3.06E-08 | <b><i>potE</i></b>          | <b>-1.50</b>                                         | <b>1.87E-02</b> |                                                 |                |
| HI0591               | Ornithine decarboxylase ( <i>speF</i> )                            | -4.0        | 2.54E-08 | <i>speF</i>                 |                                                      |                 |                                                 |                |
| HI0592               | Conserved hypothetical protein                                     | -4.4        | 4.62E-08 | no homolog                  |                                                      |                 |                                                 |                |
| HI0884               | Aerobic respiration control protein ArcA ( <i>arcA</i> )           | -654.8      | 2.72E-12 | <b><i>arcA</i></b>          | <b>-2.09</b>                                         | <b>2.37E-03</b> |                                                 |                |
| HI1349               | Conserved hypothetical protein, similar to dps protein family      | -3.4        | 1.43E-07 | <i>dps</i>                  |                                                      |                 |                                                 |                |

**Similarities and differences across species in putative ArcA regulons.** *H. influenzae arcA* microarray expression data (from Tables 1 and 2, columns RAA6V/ RdV) was compared to *E. coli arcA* microarray expression data of Salmon *et al.* (Salmon, K.A., *et al.* 2005. *J. Biol. Chem.* 280: 15084-15096) and Liu and De Wulf (Liu, X. and P. De Wulf. 2004. *J. Biol. Chem.* 279:12588-12597).

Putative *E. coli* homologs in bold have expression data from either microarray sets of Salmon *et al.* or Liu and De Wulf that show agreement with the *H. influenzae* array data in anaerobic expression ratios in the  $\Delta arcA$  mutant, RAA6V vs. the parent strain, RdV. Fold change values represent an increase (positive) or decrease (negative) in gene expression in the  $\Delta arcA$  mutant vs. parent strain, RdV. *E. coli* homologs with blank entries are genes whose expression levels did not meet the authors' criteria for minimum signal detection on the array.
